# Supplementary material for: CO2 conversion by high-dose rate electron beam irradiation: one-step, metal-free and simultaneous production of H2, CO, CH4, C2H6 and organic acids from an acid-decomposed CaCO3/additive EtOH mixture
Source: Royal Society of Chemistry journal article supplement (doi:10.1039/c9gc00525k), 2019-01-01
Supplement: c9gc00525k1.pdf [file c9gc00525k1.pdf]

Electronic Supplementary information (ESI) for

**CO<sub>2</sub> Conversion by High-Dose Rate Electron Beam Irradiation: One Step, Metal-Free, Simultaneous, and Accelerated Production of H<sub>2</sub>, CO, CH<sub>4</sub>, C<sub>2</sub>H<sub>6</sub> and Organic Acid from Acid-Decomposed CaCO<sub>3</sub>/Additive EtOH Mixture**

Yoichi Hosokawa,<sup>\*a</sup> Shuji Kajiya,<sup>a</sup> Ayako Ohshima,<sup>a</sup> Nobuhiro Ishida,<sup>\*a</sup> Masakazu Washio<sup>b</sup> and Arimitsu Usuki<sup>a,†</sup>

<sup>a</sup>*Toyota Central R&D Labs., Inc., 41-1, Nagakute, Aichi 480-1192, Japan*

<sup>b</sup>*Waseda Research Institute for Science and Engineering, Waseda University, 3-4-1 Okubo, Shinjuku, Tokyo 169-8555, Japan*

<sup>†</sup>*Present Address: Research Institute for Sustainable Humanosphere Kyoto University Uji, Kyoto 611-0011, Japan*

**List of Contents**

|                                                                                                                                                                                                                                             |    |
|---------------------------------------------------------------------------------------------------------------------------------------------------------------------------------------------------------------------------------------------|----|
| <b>Table S1.</b> Results of experiments performed under identical conditions for reproducibility confirmation (CaCO <sub>3</sub> /1 N HCl/EtOH, 100 kGy × 1, n = 3). Primary data of GC/CE analysis and averages/standard deviations.....   | S2 |
| <b>Fig. S1.</b> Typical GC-MS charts of CO, CH <sub>4</sub> , and C <sub>2</sub> H <sub>6</sub> (100 kGy × 1).....                                                                                                                          | S2 |
| <b>Table S2.</b> GC primary data for EB-irradiated samples treated under different conditions.....                                                                                                                                          | S3 |
| <b>Fig. S2.</b> <sup>13</sup> C NMR (400 MHz, D <sub>2</sub> O) spectra of reference samples [0.4 mL irradiated solution/0.2 mL D <sub>2</sub> O mixtures] after EB irradiation (100 kGy × 1).....                                          | S3 |
| <b>Fig. S3.</b> Qualitative UV spectra of reference samples and of the reaction solution before EB irradiation.....                                                                                                                         | S3 |
| <b>Fig. S4.</b> Selected GC-MS charts of aqueous phases. (a) Complete charts [different intensity scales], (b) MeOH analysis chart.....                                                                                                     | S4 |
| <b>Fig. S5.</b> Qualitative UV spectra (H <sub>2</sub> O, 3–10%) of pure compounds observed in MS spectra.....                                                                                                                              | S5 |
| <b>Table S3.</b> Concentrations of organic acids (including all isotopes) in the aqueous phase estimated by CE analysis.....                                                                                                                | S5 |
| <b>Fig. S6.</b> Typical CE electropherogram of the aqueous solution (100 kGy × 1).....                                                                                                                                                      | S5 |
| <b>Table S4.</b> Comparison of <sup>13</sup> C/ <sup>12</sup> C isotope ratio between natural organic acids and experimentally observed organic acids (300 kGy irradiated sample). (a) Formate, (b) acetate, and (c) propionate ratios..... | S6 |
| <b>Table S5.</b> <sup>13</sup> C organic acid concentrations estimated by CE and GC-MS analyses.....                                                                                                                                        | S6 |

**Table S1.** Results of experiments performed under identical conditions for reproducibility confirmation ( $\text{CaCO}_3/1$  N HCl/EtOH,  $100 \text{ kGy} \times 1$ ,  $n = 3$ ). Primary data of GC/CE analysis and averages/standard deviations.

| Number  | GC-TCD (%)     |                 | GC-MS (ppm)                 |                             |                                           |                             |                             |                                           |                               | CE ( $\mu\text{g/mL}$ ) |         |            |
|---------|----------------|-----------------|-----------------------------|-----------------------------|-------------------------------------------|-----------------------------|-----------------------------|-------------------------------------------|-------------------------------|-------------------------|---------|------------|
|         | H <sub>2</sub> | CO <sub>2</sub> | CH <sub>4</sub>             |                             |                                           | CO                          |                             |                                           | C <sub>2</sub> H <sub>6</sub> | Formate                 | Acetate | Propionate |
|         |                |                 | $m/z$ 16<br><sup>12</sup> C | $m/z$ 17<br><sup>13</sup> C | <sup>13</sup> C/ <sup>12</sup> C<br>ratio | $m/z$ 28<br><sup>12</sup> C | $m/z$ 29<br><sup>13</sup> C | <sup>13</sup> C/ <sup>12</sup> C<br>ratio | $m/z$ 30<br><sup>12</sup> C   |                         |         |            |
| 1       | 10             | 81              | 1200                        | 14                          | 0.0117                                    | 220                         | 1200                        | 5.45                                      | 90                            | 94                      | 17      | <10        |
| 2       | 11             | 78              | 1300                        | 15                          | 0.0115                                    | 250                         | 1200                        | 4.80                                      | 98                            | 92                      | 19      | <10        |
| 3       | 10             | 80              | 1300                        | 15                          | 0.0115                                    | 240                         | 1200                        | 5.00                                      | 100                           | 93                      | 17      | <10        |
| Average | 10             | 80              | 1267                        | 15                          | 0.0116                                    | 237                         | 1200                        | 5.08                                      | 96                            | 93                      | 18      | <10        |
| STDEV   | 0.69           | 1.29            | 57.74                       | 0.58                        | 0.00                                      | 15.28                       | 0.00                        | 0.27                                      | 5.29                          | 1.00                    | 1.15    | 0.00       |

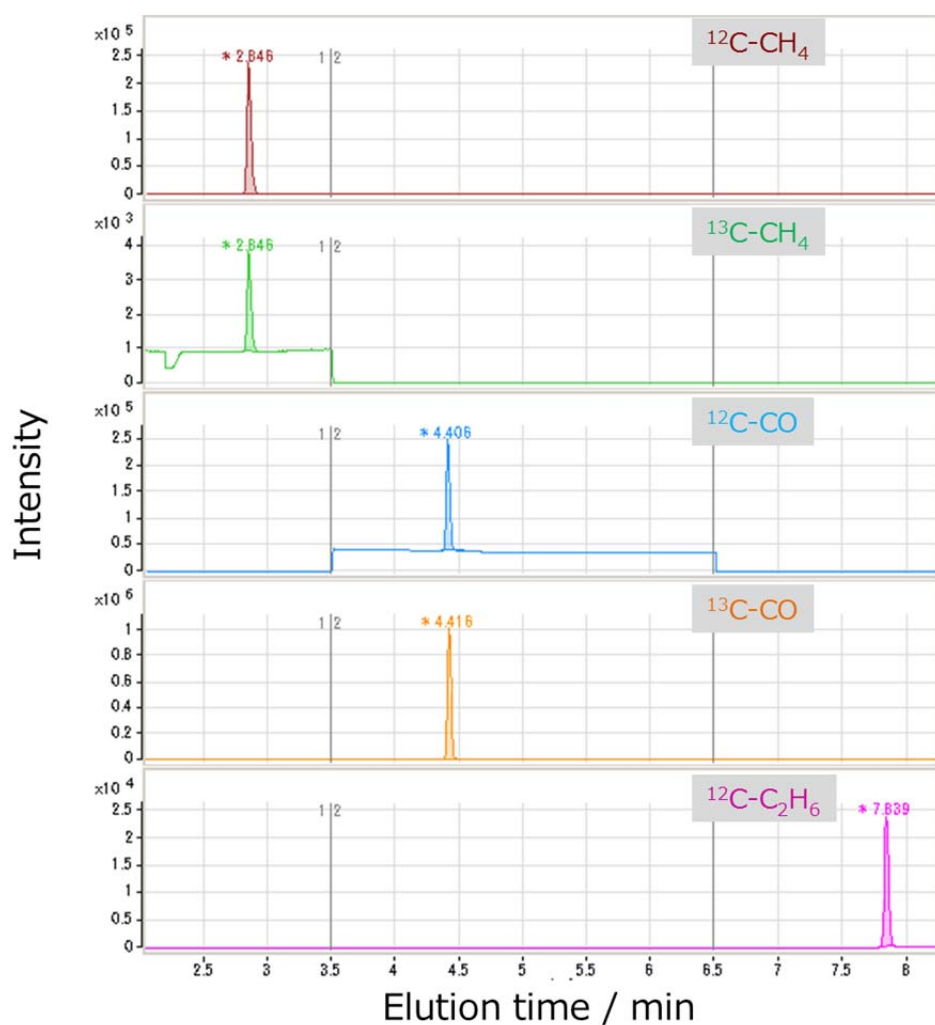

**Fig. S1.** Typical GC-MS charts of CO, CH<sub>4</sub>, and C<sub>2</sub>H<sub>6</sub> ( $100 \text{ kGy} \times 1$ ).

**Table S2.** GC primary data for EB-irradiated samples treated under different conditions.

| Entry | Sample Contents                                           | Dose / kGy<br>(kGy/s × Pass) | GC-TCD (%)     |                 | GC-MS (ppm)     |                 |                                  |                 |                 |                                  |                               |
|-------|-----------------------------------------------------------|------------------------------|----------------|-----------------|-----------------|-----------------|----------------------------------|-----------------|-----------------|----------------------------------|-------------------------------|
|       |                                                           |                              | H <sub>2</sub> | CO <sub>2</sub> | CH <sub>4</sub> |                 |                                  | CO              |                 |                                  | C <sub>2</sub> H <sub>6</sub> |
|       |                                                           |                              |                |                 | <sup>12</sup> C | <sup>13</sup> C | <sup>13</sup> C/ <sup>12</sup> C | <sup>12</sup> C | <sup>13</sup> C | <sup>13</sup> C/ <sup>12</sup> C | <sup>12</sup> C               |
| 1     | CaCO <sub>3</sub> /1 N HCl/EtOH                           | 25 (25 × 1)                  | 3              | 68              | 230             | 2.5             | 0.0109                           | 35              | 220             | 6.29                             | 15                            |
| 2     |                                                           | 100 (25 × 4)                 | 13             | 71              | 1300            | 14              | 0.0108                           | 180             | 980             | 5.44                             | 85                            |
| 3     |                                                           | 100 (100 × 1)                | 10             | 80              | 1300            | 15              | 0.0115                           | 240             | 1200            | 5.00                             | 100                           |
| 4     |                                                           | 300 (100 × 3)                | 21             | 65              | 390             | 4.1             | 0.0105                           | 84              | 320             | 3.81                             | 28                            |
| R1    | CaCO <sub>3</sub> /1 N HCl                                | 100 (100 × 1)                | 1              | 91              | 2.1             | N.D.            | N.D.                             | 13              | 420             | 32.31                            | N.D.                          |
| R2    | CaCl <sub>2</sub> /H <sub>2</sub> O/EtOH                  |                              | 6              | 0.03            | 630             | 6.9             | 0.0110                           | 52              | 0.7             | 0.01                             | 150                           |
| R3    | H <sub>2</sub> O/EtOH                                     |                              | 6              | 0.04            | 800             | 8.8             | 0.0110                           | 64              | 0.8             | 0.01                             | 180                           |
| R4    | CO <sub>2</sub> /CaCl <sub>2</sub> /H <sub>2</sub> O/EtOH |                              | 8              | 23              | 460             | 5.2             | 0.0113                           | 84              | 170             | 2.02                             | 40                            |
| R5    | CO <sub>2</sub> /CaCl <sub>2</sub> /H <sub>2</sub> O      |                              | 0              | 34              | 2.4             | 0.2             | 0.0833                           | 6.7             | 70              | 10.45                            | N.D.                          |
| R6    | CO <sub>2</sub> /H <sub>2</sub> O/EtOH                    |                              | 7              | 31              | 420             | 4.7             | 0.0112                           | 74              | 200             | 2.70                             | 32                            |
| R7    | CO <sub>2</sub> /H <sub>2</sub> O                         |                              | 0              | 30              | 3.0             | 0.2             | 0.0667                           | 7.0             | 65              | 9.29                             | N.D.                          |

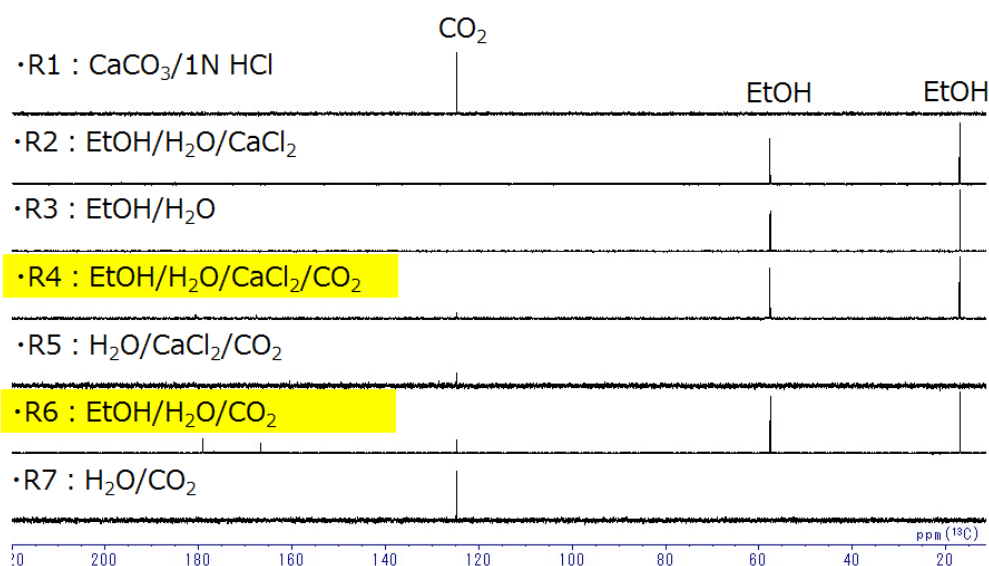

**Fig. S2.** <sup>13</sup>C NMR (400 MHz, D<sub>2</sub>O) spectra of reference samples [0.4 mL irradiated solution/0.2 mL D<sub>2</sub>O mixtures] after EB irradiation (100 kGy × 1).

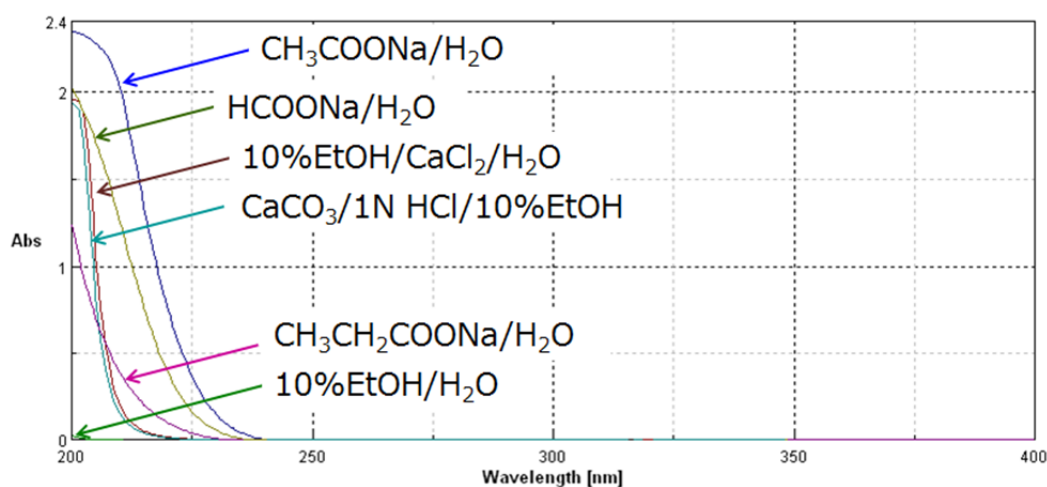

**Fig. S3.** Qualitative UV spectra of reference samples and of the reaction solution before EB irradiation.

a)

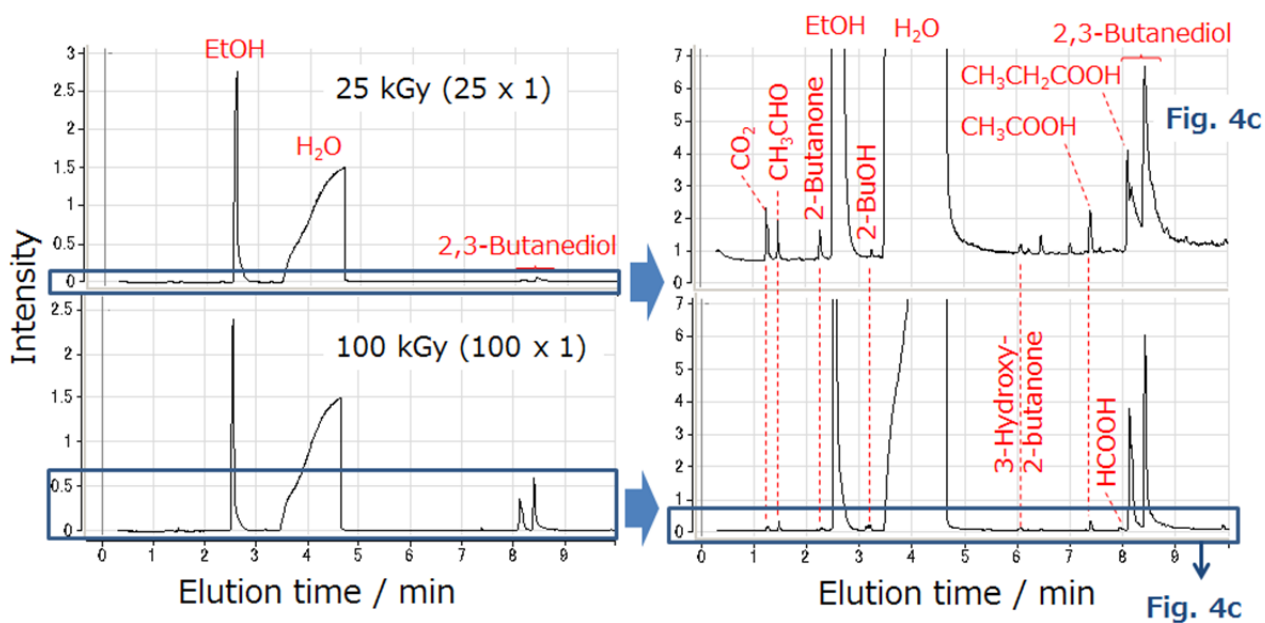

b)

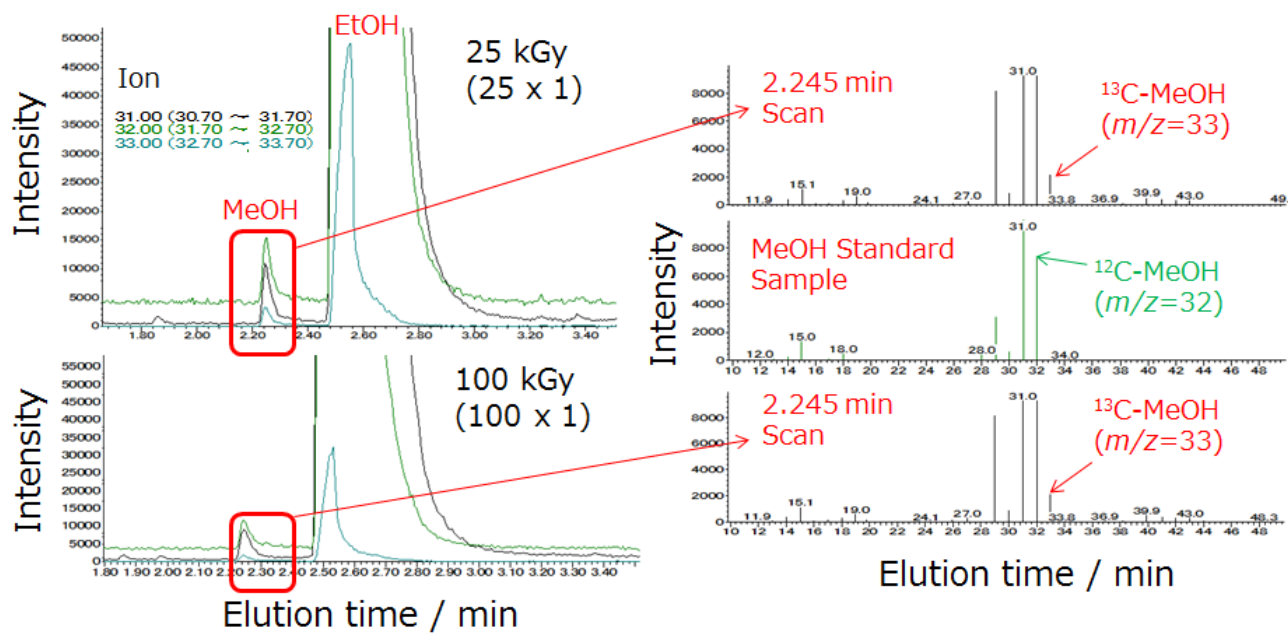

**Fig. S4.** Selected GC-MS charts of aqueous phases. (a) Complete charts [different intensity scales], (b) MeOH analysis chart.

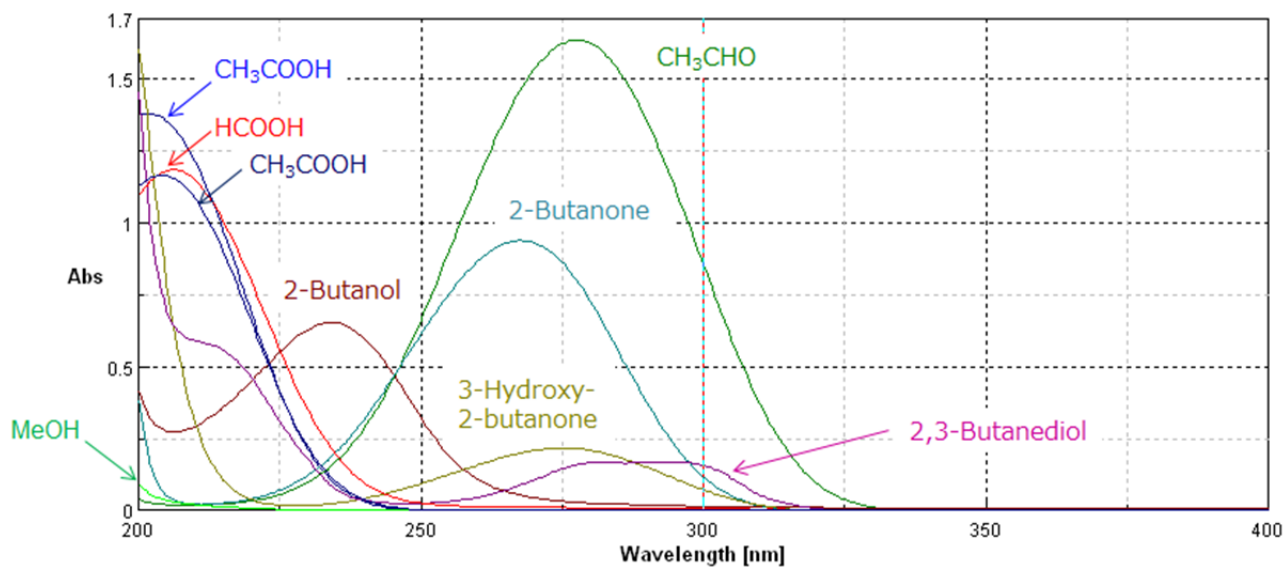

**Fig. S5.** Qualitative UV spectra ( $\text{H}_2\text{O}$ , 3–10%) of pure compounds observed in MS spectra.

**Table S3.** Concentrations of organic acids (including all isotopes) in the aqueous phase estimated by CE analysis.

| Entry | Dose / kGy<br>(kGy/s $\times$ Pass) | Concentration ( $\mu\text{g}/\text{mL}$ ) |                      |                                      |
|-------|-------------------------------------|-------------------------------------------|----------------------|--------------------------------------|
|       |                                     | HCOOH                                     | CH <sub>3</sub> COOH | CH <sub>3</sub> CH <sub>2</sub> COOH |
| 1     | 25 (25 $\times$ 1)                  | 24                                        | <10                  | <10                                  |
| 3     | 100 (100 $\times$ 1)                | 94                                        | 17                   | <10                                  |
| 4     | 300 (100 $\times$ 3)                | 220                                       | 69                   | 28                                   |

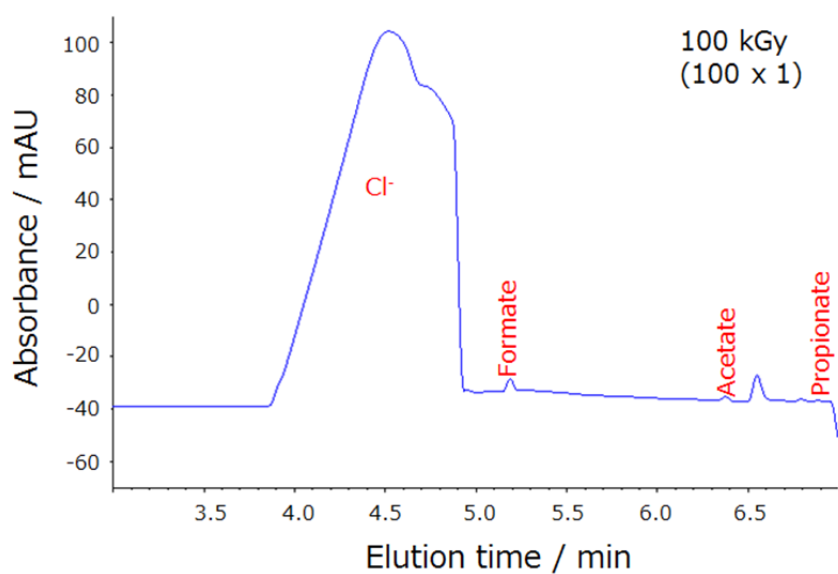

**Fig. S6.** Typical CE electropherogram of the aqueous solution (100 kGy  $\times$  1).

**Table S4.** Comparison of  $^{13}\text{C}/^{12}\text{C}$  isotope ratio between natural organic acids and experimentally observed organic acids (300 kGy irradiated sample). (a) Formate, (b) acetate, and (c) propionate ratios.

**a)**

| Methyl formate  | $m/z$ | Isotope ratio (%) |          |
|-----------------|-------|-------------------|----------|
|                 |       | Natural           | Observed |
| $^{12}\text{C}$ | 60    | 0.989             | 0.221    |
| $^{13}\text{C}$ | 61    | 0.011             | 0.779    |

**c)**

| Methyl propionate                           | $m/z$ | Isotope ratio (%) |          |
|---------------------------------------------|-------|-------------------|----------|
|                                             |       | Natural           | Observed |
| $^{12}\text{C}-^{12}\text{C}-^{12}\text{C}$ | 88    | 0.968             | 0.088    |
| $^{12}\text{C}-^{12}\text{C}-^{13}\text{C}$ | 89    | 0.031             | 0.879    |
| $^{12}\text{C}-^{13}\text{C}-^{13}\text{C}$ | 90    | (0.000339)        | 0.024    |
| $^{13}\text{C}-^{13}\text{C}-^{13}\text{C}$ | 91    | (0.000001)        | -        |

**b)**

| Methyl acetate                | $m/z$ | Isotope ratio (%) |          |
|-------------------------------|-------|-------------------|----------|
|                               |       | Natural           | Observed |
| $^{12}\text{C}-^{12}\text{C}$ | 74    | 0.979             | 0.892    |
| $^{12}\text{C}-^{13}\text{C}$ | 75    | 0.021             | 0.101    |
| $^{13}\text{C}-^{13}\text{C}$ | 76    | (0.0001)          | 0.007    |

–: Not detected

**Table S5.**  $^{13}\text{C}$  organic acid concentrations estimated by CE and GC-MS analyses.

| Entry | Dose / kGy<br>(kGy/s × Pass) | Concentration ( $\mu\text{g}/\text{mL}$ ) |                               |                               |                                             |                                             |
|-------|------------------------------|-------------------------------------------|-------------------------------|-------------------------------|---------------------------------------------|---------------------------------------------|
|       |                              | HCOOH                                     | $\text{CH}_3\text{COOH}$      |                               | $\text{CH}_3\text{CH}_2\text{COOH}$         |                                             |
|       |                              | $^{13}\text{C}$                           | $^{12}\text{C}-^{13}\text{C}$ | $^{13}\text{C}-^{13}\text{C}$ | $^{12}\text{C}-^{12}\text{C}-^{13}\text{C}$ | $^{12}\text{C}-^{13}\text{C}-^{13}\text{C}$ |
| 1     | 25<br>(25×1)                 | 11                                        | -                             | -                             | -                                           | -                                           |
| 3     | 100<br>(100×1)               | 73                                        | 1.8                           | -                             | -                                           | -                                           |
| 4     | 300<br>(100×3)               | 171                                       | 7                             | 0.5                           | 24.6                                        | 0.7                                         |

–: Not detected
